# Supplementary material for: CeO2/rGO/Pt sandwich nanostructure: rGO-enhanced electron transmission between metal oxide and metal nanoparticles for anodic methanol oxidation of direct methanol fuel cells
Source: Royal Society of Chemistry journal article supplement (doi:10.1039/c2nr31765f), 2012-01-01
Supplement: c2nr31765f.pdf [file c2nr31765f.pdf]

Supporting Information for

**CeO<sub>2</sub>/rGO/Pt sandwich nanostructure: rGO-enhanced electron transmission between metal oxide and metal nanoparticles for anodic methanol oxidation of direct methanol fuel cells**

Xue Yu, Long Kuai and Baoyou Geng\*

*College of Chemistry and Materials Science, Anhui Key Laboratory of  
Functional Molecular Solids, Anhui Laboratory of Molecular-Based Materials,  
Anhui Normal University, Wuhu 241000, P. R. China*

**Corresponding author's E-mail:** [bygeng@mail.ahnu.edu.cn](mailto:bygeng@mail.ahnu.edu.cn)

**Additional Figures and Figure Captions**

**Figure S1**

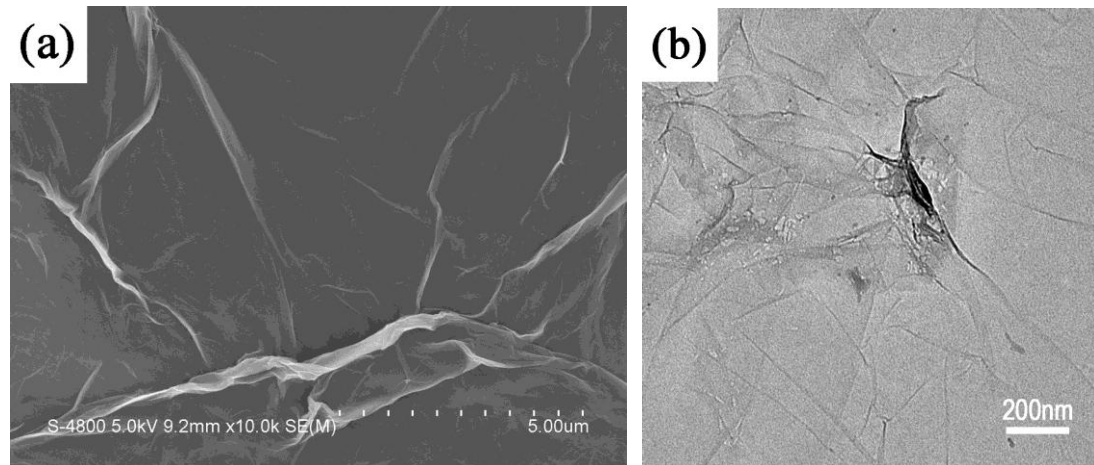

**Figure S1.** SEM (a) and TEM (b) of graphene oxide thin film prepared as previous report.

**Figure S2**

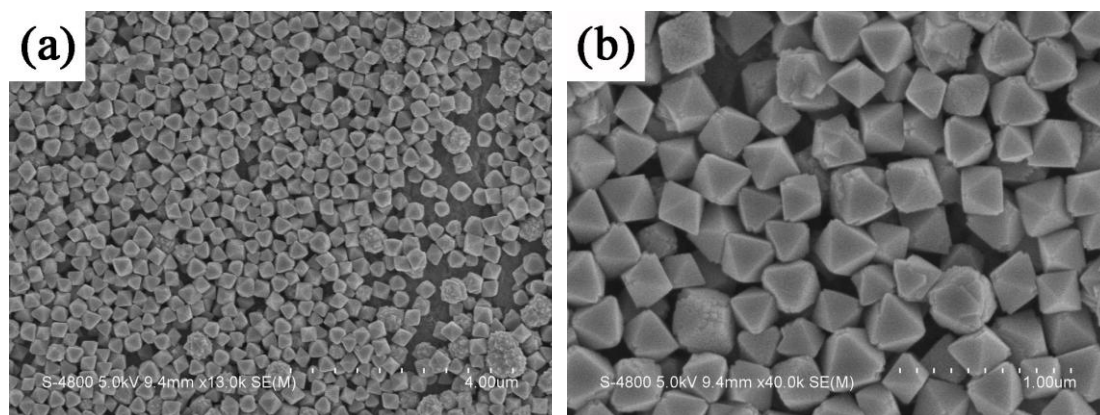

**Figure S2.** Low (a) and high (b) magnification of CeO<sub>2</sub> nanoparticles prepared as previous report.

**Figure S3**

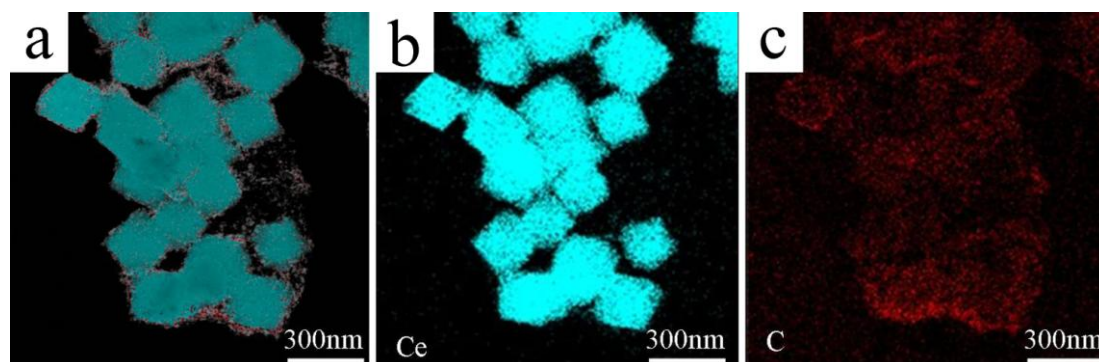

**Figure S3.** Element mapping images of the combination of Ce and C (a), Ce (b) and C (c), respectively.

**Figure S4**

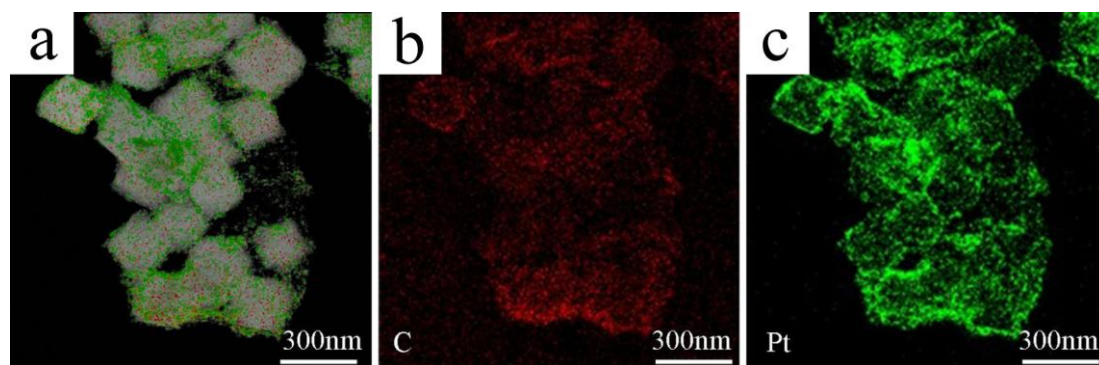

**Figure S4.** Element mapping images of the combination of C and Pt (a), C (b) and Pt (c), respectively.
